# Supplementary material for: Estimating successive pKa values of polyprotic acids from ab initio molecular dynamics using metadynamics: the dissociation of phthalic acid and its isomers
Source: Royal Society of Chemistry journal article supplement (doi:10.1039/c4cp06000h), 2015-01-01
Supplement: c4cp06000h4.pdf [file c4cp06000h4.pdf]

# Estimating successive $pK_a$ values of polyprotic acids from *ab initio* molecular dynamics using metadynamics: the dissociation of phthalic acid and its isomers

*Anil Kumar Tummanapelli and Sukumaran Vasudevan\**

Department of Inorganic and Physical Chemistry

Indian Institute of Science, Bangalore 560012,

INDIA

## **SUPPLEMENTARY INFORMATION**

\* Author to whom correspondence may be addressed. E-mail: svipc@ipc.iisc.ernet.in. Tel: +91-80-2293-2661. Fax: +91-80-2360-1552/0683;

## CONTENTS:

**Table S1:** The number of water molecules and dimension of the simulation cell for the acid molecules investigated.

**Movie S1:** Movie file of the configurations along the trajectory of the dissociation of benzoic acid.

**Figure S1:** Structure of the contact-ion pair formed during the dissociation of benzoic acid.

**Movie S2:** Movie file of the configurations along the trajectory of the first dissociation of phthalic acid.

**Movie S2:** Movie file of the configurations along the trajectory of the second dissociation of phthalic acid.

**Figure S2:** The O-H distances of the contact-ion pair formed during the first and second dissociation reaction of phthalic acid.

**Figure S3:** The free energy profiles for the first and second acid dissociation of (a) isophthalic acid (b) terephthalic acid.

**Table S1:** The number of water molecules and dimension of the simulation cell for the acid molecules investigated.

| <b>Acid</b>  | <b>Cell size<br/>(Å)</b> | <b>No. of water<br/>molecules</b> |
|--------------|--------------------------|-----------------------------------|
| Benzoic      | 11.97                    | 52                                |
| Phthalic     | 11.94                    | 51                                |
| Isophthalic  | 11.94                    | 51                                |
| Terephthalic | 11.94                    | 51                                |

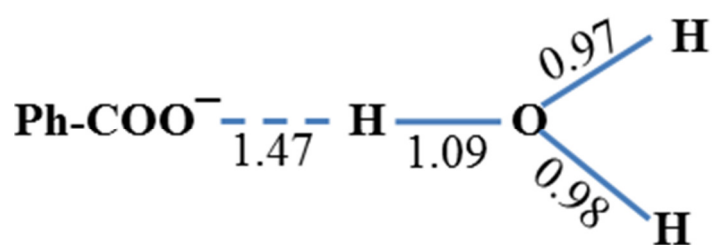

**Figure S1:** Structure of the contact-ion pair formed during the dissociation of benzoic acid.

Distances are given in angstroms.

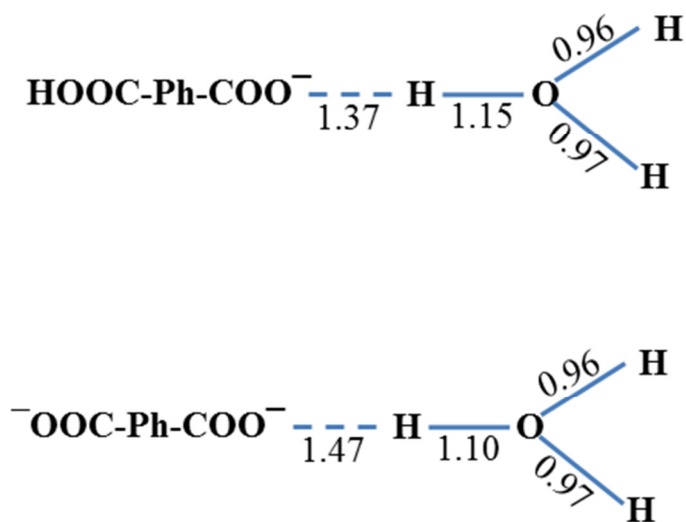

**Figure S2:** The O-H distances (in angstroms) of the contact-ion pair formed during the first and second dissociation reaction of phthalic acid.

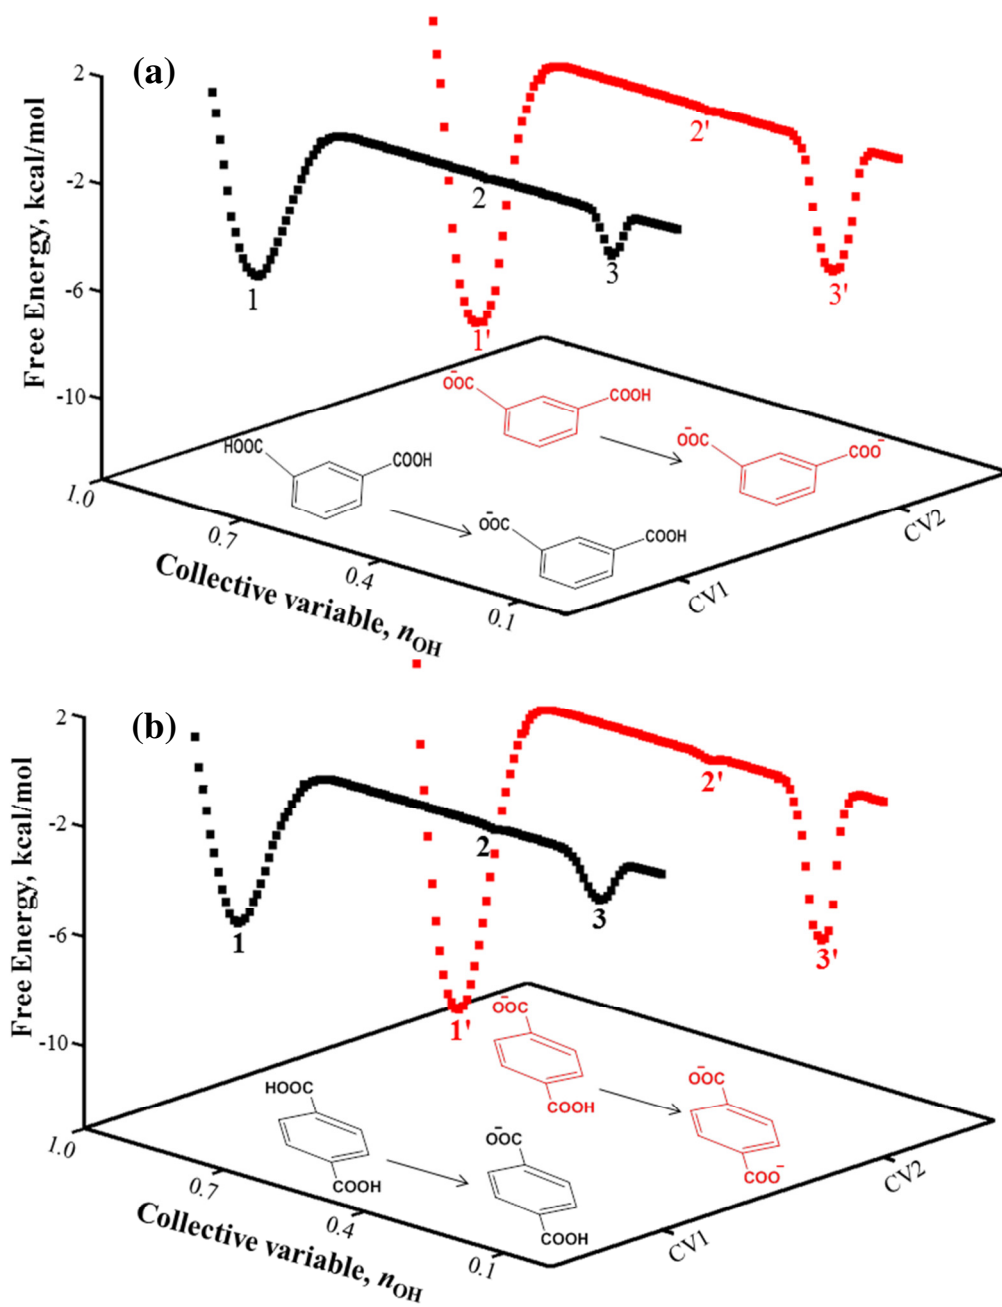

**Figure S3:** The free energy profiles for the first and second acid dissociation of (a) isophthalic acid (b) terephthalic acid.
